# Supplementary material for: Enhanced atmospheric oxidation and particle reductions driving changes to nitrate formation mechanisms across coastal and inland regions of north China
Source: Copernicus journal article supplement (doi:10.5194/acp-25-8719-2025), 2025-08-11
Supplement: Supplementary file 1 [file acp-25-8719-2025-supplement.pdf]

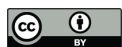

*Supplement of*

## **Enhanced atmospheric oxidation and particle reductions driving changes to nitrate formation mechanisms across coastal and inland regions of north China**

**Zhenze Liu et al.**

*Correspondence to:* Jianhua Qi ([qjianhua@ouc.edu.cn](mailto:qjianhua@ouc.edu.cn)) and Xiaohuan Liu ([liuxh1983@ouc.edu.cn](mailto:liuxh1983@ouc.edu.cn))

The copyright of individual parts of the supplement might differ from the article licence.

## Text S1

Our isotope blank measurements followed the same procedure as the sample isotope analysis. Specifically, in the sample measurements, after purging with high-purity nitrogen, 20 nmol of nitrogen was added to the headspace vial containing the *Pseudomonas aureofaciens* (ATCC13985) strain. For the blank measurements, no sample was added, and after 24 hours, 10 M NaOH was directly injected to quench the reaction before the analysis. The peak area in the chromatogram represents the absolute amount of N<sub>2</sub>O reduced by the strain, and the  $\delta^{15}\text{N}$  and  $\delta^{18}\text{O}$  values correspond to the  $\delta^{15}\text{N}$  and  $\delta^{18}\text{O}$  values of the sample. The peak area for the samples was around 10, while the peak areas for the two blank measurements were only 0.371 and 0.336, indicating an influence on the isotope values of less than 5%, which is negligible and thus not considered.

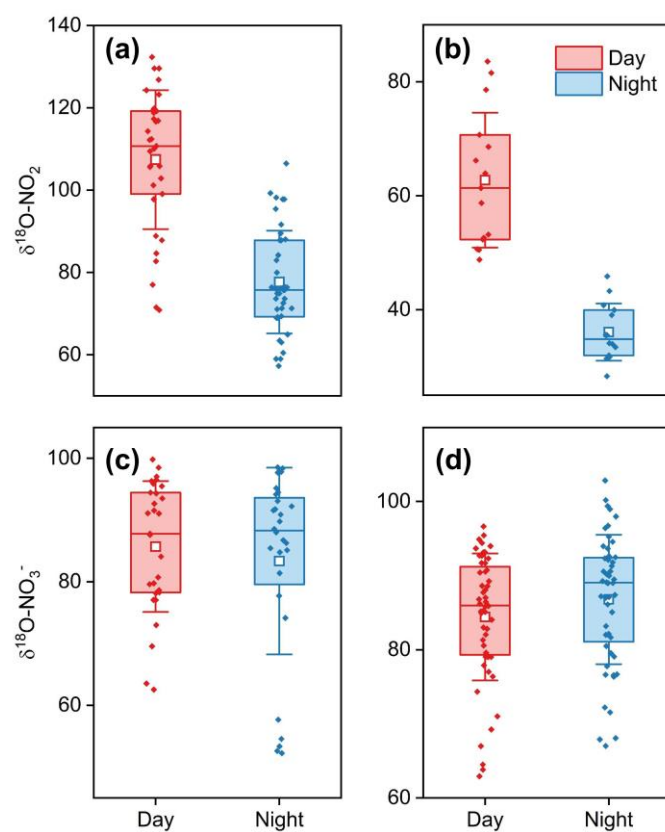

**Figure S1.** The diurnal values of atmospheric  $\delta^{18}\text{O-NO}_2$  in Hefei winter (Zhang et al., 2025) (a) and in Nanchang summer (Cao, 2022) (b), and  $\delta^{18}\text{O-NO}_3^-$  in Tianjin winter (Feng et al., 2020) (c) and in Nanjing winter (Zhang et al., 2022) (d).

## Text S2

In most studies, the tropospheric  $\delta^{15}\text{N}$ -NO<sub>x</sub> was often assumed as 0‰ following Walters and Michalski (2016), Luo et al. (2023) and Deng et al. (2024). In addition, the tropospheric  $\delta^{18}\text{O}$ -H<sub>2</sub>O<sub>(g)</sub> in Beijing in winter was determined as -27.9‰ in Wen et al. (2010), and in Qingdao, it was determined as -18.6‰ in Wang et al. (2022). The tropospheric  $\delta^{18}\text{O}$ -NO<sub>x</sub> ranged from 112‰ to 122‰ (Michalski et al., 2014; Walters and Michalski, 2016). The  $f_{\text{NO}_2}$  values in Beijing and Qingdao were 0.655 (Luo et al., 2023) and 0.786 (Lian et al., 2022) in winter, respectively.

$$\begin{aligned}\delta^{15}\text{N} - \text{NO}_3^- &= \gamma \times [\delta^{15}\text{N} - \text{NO}_3^-]_{\text{OH}} + (1 - \gamma) \times [\delta^{15}\text{N} - \text{NO}_3^-]_{\text{N}_2\text{O}_5} \\ &= \gamma \times [\delta^{15}\text{N} - \text{HNO}_3]_{\text{OH}} + (1 - \gamma) \times [\delta^{15}\text{N} - \text{HNO}_3]_{\text{N}_2\text{O}_5}\end{aligned}\quad (\text{S1})$$

$$\begin{aligned}\delta^{18}\text{O} - \text{NO}_3^- &= \gamma \times [\delta^{18}\text{O} - \text{NO}_3^-]_{\text{OH}} + (1 - \gamma) \times [\delta^{18}\text{O} - \text{NO}_3^-]_{\text{N}_2\text{O}_5} \\ &= \gamma \times [\delta^{18}\text{O} - \text{HNO}_3]_{\text{OH}} + (1 - \gamma) \times [\delta^{18}\text{O} - \text{HNO}_3]_{\text{N}_2\text{O}_5}\end{aligned}\quad (\text{S2})$$

$$\begin{aligned}[\delta^{15}\text{N} - \text{HNO}_3]_{\text{OH}} &= \delta^{15}\text{N} - \text{NO}_2 \\ &= 1000 \times \left[ \frac{(^{15}\alpha_{\text{NO}_2/\text{NO}} - 1)(1 - f_{\text{NO}_2})}{(1 - f_{\text{NO}_2}) + (^{15}\alpha_{\text{NO}_2/\text{NO}} \times f_{\text{NO}_2})} \right] + \delta^{15}\text{N} - \text{NO}_x\end{aligned}\quad (\text{S3})$$

$$[\delta^{15}\text{N} - \text{HNO}_3]_{\text{N}_2\text{O}_5} = 1000 \times (^{15}\alpha_{\text{N}_2\text{O}_5/\text{NO}_2} - 1) + \delta^{15}\text{N} - \text{NO}_x \quad (\text{S4})$$

$$\begin{aligned}[\delta^{18}\text{O} - \text{HNO}_3]_{\text{OH}} &= \frac{2}{3} \times [\delta^{18}\text{O} - \text{NO}_2]_{\text{OH}} + \frac{1}{3} \times [\delta^{18}\text{O} - \text{OH}]_{\text{OH}} \\ &= \frac{2}{3} \times \left[ \frac{1000 \times (^{18}\alpha_{\text{NO}_2/\text{NO}} - 1) \times (1 - f_{\text{NO}_2})}{(1 - f_{\text{NO}_2}) + (^{18}\alpha_{\text{NO}_2/\text{NO}} \times f_{\text{NO}_2})} + [\delta^{18}\text{O} - \text{NO}_x] \right] \\ &\quad + \frac{1}{3} \times \left[ (\delta^{18}\text{O} - \text{H}_2\text{O}_{(g)}) + 1000 \times (^{18}\alpha_{\text{OH}/\text{H}_2\text{O}_{(g)}} - 1) \right]\end{aligned}\quad (\text{S5})$$

$$[\delta^{18}\text{O} - \text{HNO}_3]_{\text{N}_2\text{O}_5} = \left( \delta^{18}\text{O} - \text{NO}_2 + 1000 \times (^{18}\alpha_{\text{N}_2\text{O}_5/\text{NO}_2} - 1) \right) \times \frac{5}{6} + \delta^{15}\text{N} - \text{H}_2\text{O} \times \frac{1}{6} \quad (\text{S6})$$

$$1000(^m\alpha_{x/y} - 1) = \frac{A}{T^4} \times 10^{10} + \frac{B}{T^3} \times 10^8 + \frac{C}{T^2} \times 10^6 + \frac{D}{T} \times 10^4 \quad (\text{S7})$$

**Table S1.** Values of  $\delta^{18}\text{O}$  from atmospheric components.

| Components                                 | Values (‰)          | References                                                                                                                                                  |
|--------------------------------------------|---------------------|-------------------------------------------------------------------------------------------------------------------------------------------------------------|
| $\text{O}_3$                               | From 80 to 130      | Michalski et al., 2011                                                                                                                                      |
| $\text{O}_2$                               | 23.5                | Kroopnick and Craig; 1972                                                                                                                                   |
| $\text{H}_2\text{O}$ (g) in Beijing winter | -27.9               | Wen et al., 2010                                                                                                                                            |
| $\text{H}_2\text{O}$ (g) in Qingdao winter | -18.6               | Wang et al., 2022                                                                                                                                           |
| $\cdot\text{OH}$ in Beijing winter         | From -72.4 to -64.9 | $\delta^{18}\text{O}-\text{OH} = \delta^{18}\text{O}-\text{H}_2\text{O}_{(\text{g})} + 1000(^{18}\alpha_{\text{X/Y}} - 1)$<br>(Walters and Michalski, 2016) |
| $\cdot\text{OH}$ in Qingdao winter         | From -61.2 to -57.8 |                                                                                                                                                             |

**Table S2.**  $^{15}\alpha_{A/B}$  and  $^{18}\alpha_{A/B}$  regression coefficients as a function of the temperature ( $150\text{ K} \leq T \leq 450\text{ K}$ ) (Walters and Michalski, 2015, 2016).

|                     |                                                  | A        | B       | C       | D        |
|---------------------|--------------------------------------------------|----------|---------|---------|----------|
| $^{15}\alpha_{A/B}$ | $\text{N}_2\text{O}_5/\text{NO}_2$               | 0.69398  | -1.9859 | 2.3876  | 0.16308  |
|                     | $\text{NO}_2/\text{NO}$                          | 3.8834   | -7.7299 | 6.0101  | -0.17928 |
| $^{18}\alpha_{A/B}$ | $\text{NO}/\text{NO}_2$                          | -0.04129 | 1.1605  | -1.8829 | 0.74723  |
|                     | $\cdot\text{OH}/\text{H}_2\text{O}_{(\text{g})}$ | 2.1137   | -3.8026 | 2.5653  | 0.5941   |
|                     | $\text{N}_2\text{O}_5/\text{NO}_2$               | -0.54136 | 0.13073 | 1.2477  | -0.1272  |

**Table S3.** Equations for calculating the statistical evaluation indices.

| Statistical index              | Formula                                                                                                                                                                                                                                                                                                                                                 |
|--------------------------------|---------------------------------------------------------------------------------------------------------------------------------------------------------------------------------------------------------------------------------------------------------------------------------------------------------------------------------------------------------|
| 1. Mean Bias                   | $\text{MB} = \frac{1}{N} \sum_1^N (\text{Sim} - \text{Obs})$                                                                                                                                                                                                                                                                                            |
| 2. Root Mean Square Error      | $\text{RMSE} = \sqrt{\frac{1}{N} \sum_1^N (\text{Sim} - \text{Obs})^2}$                                                                                                                                                                                                                                                                                 |
| 3. Index of agreement, IOA     | $\text{IOA} = 1 - \frac{\sum_{i=1}^N (\text{Sim} - \text{Obs})^2}{\sum_{i=1}^N ( \text{Sim} - \text{Obs}  +  \text{Obs} - \overline{\text{Obs}} )^2}$                                                                                                                                                                                                   |
| 4. Normalized Mean Bias        | $\text{NMB} = \frac{1}{N} \sum_1^N \left( \frac{\text{Sim} - \text{Obs}}{\text{Obs}} \right)$                                                                                                                                                                                                                                                           |
| 5. Normalized Mean Error       | $\text{NME} = \frac{1}{N} \sum_1^N \left  \frac{\text{Sim} - \text{Obs}}{\text{Obs}} \right $                                                                                                                                                                                                                                                           |
| 6. Correlation coefficient (R) | $\text{R} = \frac{1}{N} \sum_{i=1}^N \left[ \frac{(\text{Sim} - \overline{\text{Sim}})(\text{Obs} - \overline{\text{Obs}})}{S_p S_o} \right]$ $S_p = \left[ \frac{1}{N} \sum_{i=1}^N (\text{Sim} - \overline{\text{Sim}})^2 \right]^{\frac{1}{2}}$ $S_o = \left[ \frac{1}{N} \sum_{i=1}^N (\text{Obs} - \overline{\text{Obs}})^2 \right]^{\frac{1}{2}}$ |

**Table S4.** Sources of nitrate observation data for the winter of 2013 and the winter of 2018 in the NCP.

| City         | Winter, 2013        | Winter, 2018       |
|--------------|---------------------|--------------------|
| Beijing      | Song et al. (2019)  | Fan et al. (2020)  |
| Tianjin      | Yao et al. (2020)   | Observation        |
| Shijiazhuang | Wang et al. (2016)  | Zhou et al. (2020) |
| Jinan        | Cheng et al. (2021) | Observation        |
| Zhengzhou    | Wei et al. (2019)   | Dong et al. (2020) |
| Qingdao      | Observation         | Observation        |
| Yantai       | /                   | /                  |

The  $\text{NO}_3^-$  observation data collected during the winter of 2018 for Tianjin were sourced from direct observations by the group of Li Xiaodong at Tianjin University (sampling site: Building 19 rooftop, Tianjin University; coordinates: 39.11°N, 117.16°E). The  $\text{NO}_3^-$  observation data collected during the winter of 2018 in Jinan were sourced from observations by the group of Xue Likun at Shandong University (sampling site: Jinan City Environmental Monitoring Station; coordinates: 36.66°N, 117.05°E). For Qingdao,  $\text{NO}_3^-$  observation data for both the winter of 2018 and the winter of 2013 were derived from our own observations.

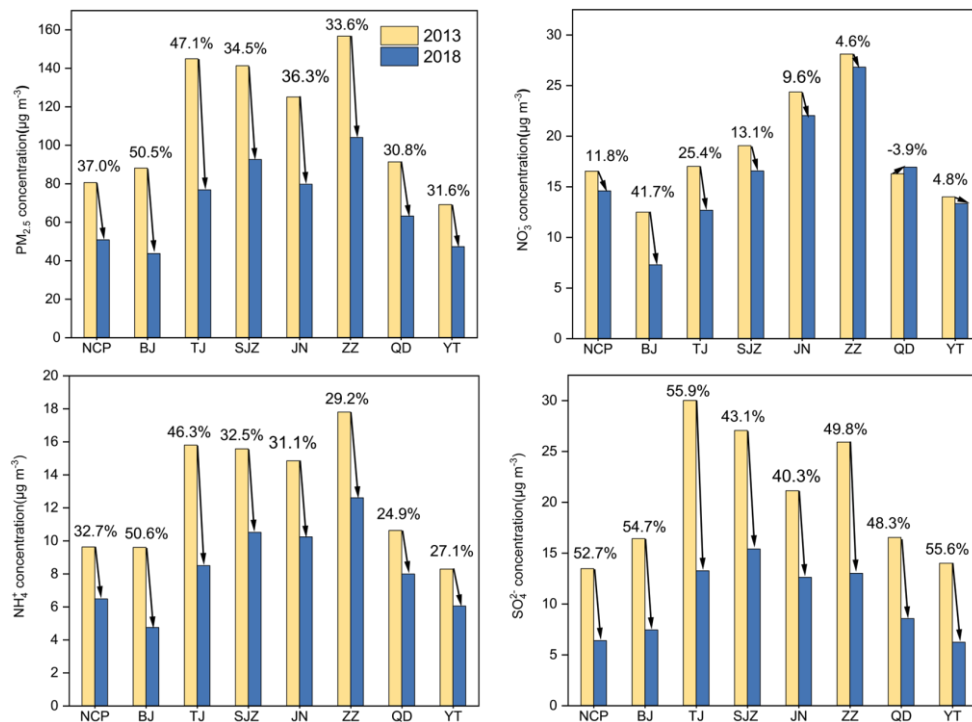

**Figure S2.** Concentrations of PM<sub>2.5</sub> and its components in seven major cities in the NCP region during the winters of 2013 and 2018.

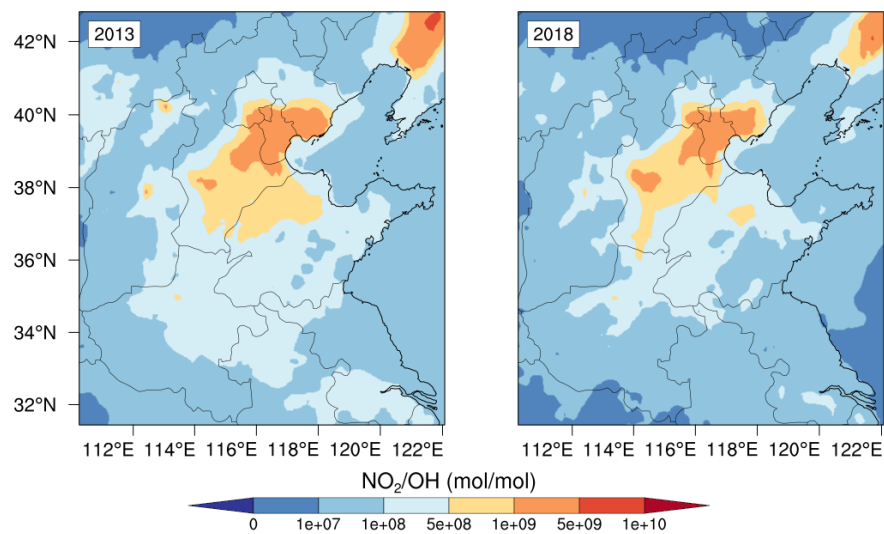

**Figure S3.** Spatial distribution of the NO<sub>2</sub>/OH molar ratio in the NCP region during the winters of 2013 and 2018.



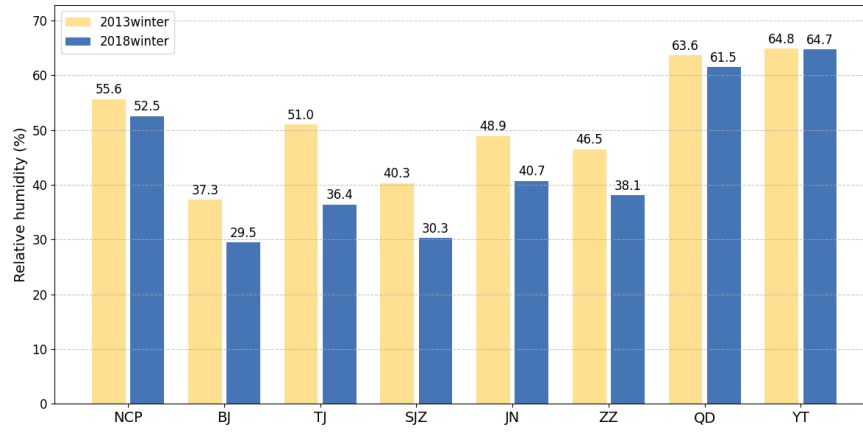

**Figure S4.** Relative humidity in the NCP and seven major cities (2013, 2018).

## Reference

- Cheng, M., Tang, G., Lv, B., Li, X., Wu, X., Wang, Y., and Wang, Y.: Source apportionment of PM<sub>2.5</sub> and visibility in Jinan, China, *Journal of Environmental Sciences*, 102, 207-215, <https://doi.org/10.1016/j.jes.2020.09.012>, 2021.
- Deng, M., Wang, C., Yang, C., Li, X., and Cheng, H.: Nitrogen and oxygen isotope characteristics, formation mechanism, and source apportionment of nitrate aerosols in Wuhan, Central China, *Science of The Total Environment*, 921, 170715, <https://doi.org/10.1016/j.scitotenv.2024.170715>, 2024.
- Dong, Z., Su, F., Zhang, Z., and Wang, S.: Observation of chemical components of PM<sub>2.5</sub> and secondary inorganic aerosol formation during haze and sandy haze days in Zhengzhou, China, *J Journal of Environmental Sciences*, 88, 316-325, <https://doi.org/10.1016/j.jes.2019.09.016>, 2020.
- Fan, M.-Y., Zhang, Y.-L., Lin, Y.-C., Cao, F., Zhao, Z.-Y., Sun, Y., Qiu, Y., Fu, P., and Wang, Y.: Changes of Emission Sources to Nitrate Aerosols in Beijing After the Clean Air Actions: Evidence From Dual Isotope Compositions, *Journal of Geophysical Research: Atmospheres*, 125, e2019JD031998, <https://doi.org/10.1029/2019JD031998>, 2020.
- Lian, C., Wang, W., Chen, Y., Zhang, Y., Zhang, J., Liu, Y., Fan, X., Li, C., Zhan, J., Lin, Z., Hua, C., Zhang, W., Liu, M., Li, J., Wang, X., An, J., and Ge, M.: Long-term winter observation of nitrous acid in the urban area of Beijing, *Journal of Environmental Sciences*, 114, 334-342, <https://doi.org/10.1016/j.jes.2021.09.010>, 2022.
- Luo, L., Wu, S., Zhang, R., Wu, Y., Li, J., and Kao, S.-j.: What controls aerosol  $\delta^{15}\text{N}-\text{NO}_3^-$ ? NO<sub>x</sub> emission sources vs. nitrogen isotope fractionation, *Science of The Total Environment*, 871, 162185, <http://dx.doi.org/10.1016/j.scitotenv.2023.162185>, 2023.
- Michalski, G., Bhattacharya, S. K., and Girsch, G.: NO<sub>x</sub> cycle and the tropospheric ozone isotope anomaly: an experimental investigation, *Atmos. Chem. Phys.*, 14, 4935-4953, <https://doi.org/10.5194/acp-14-4935-2014>, 2014.
- Song, W., Wang, Y.-L., Yang, W., Sun, X.-C., Tong, Y.-D., Wang, X.-M., Liu, C.-Q., Bai, Z.-P., and Liu, X.-Y.: Isotopic evaluation on relative contributions of major NO<sub>x</sub> sources to nitrate of PM<sub>2.5</sub> in Beijing, *Environmental Pollution*, 248, 183-190, <https://doi.org/10.1016/j.envpol.2019.01.081>, 2019.
- Walters, W. W. and Michalski, G.: Theoretical calculation of nitrogen isotope equilibrium exchange fractionation factors for various NO<sub>y</sub> molecules, *Geochimica et Cosmochimica Acta*, 164, 284-297,

<https://doi.org/10.1016/j.gca.2015.05.029>, 2015.

Walters, W. W. and Michalski, G.: Theoretical calculation of oxygen equilibrium isotope fractionation factors involving various NO<sub>y</sub> molecules, OH, and H<sub>2</sub>O and its implications for isotope variations in atmospheric nitrate, *Geochimica et Cosmochimica Acta*, 191, 89-101, <https://doi.org/10.1016/j.gca.2016.06.039>, 2016.

Wang, X., Zhou, Y., Cheng, S., and Wang, G.: Characterization and regional transmission impact of water-soluble ions in PM<sub>2.5</sub> during winter in typical cities, China *Environmental Science*, 36, 2289-2296, 2016.

Wang, Y., Cui, B.-l., Li, D.-s., Wang, Y.-x., Yu, W.-x., and Zong, H.-h.: Stable Isotopes Reveal Water Vapor Sources of Precipitation over the Jiaolai Plain, Shandong Peninsula, China, *Asia-Pacific Journal of Atmospheric Sciences*, 58, 227-241, <https://doi.org/10.1007/s13143-021-00253-2>, 2022.

Wei, X., Gao, m., and Tong, j.: Characterization of water-soluble ions of PM<sub>2.5</sub> in Zhengzhou, *Chinese journal of quantum*, 36, 495-499, 2019.

Wen, X.-F., Zhang, S.-C., Sun, X.-M., Yu, G.-R., and Lee, X.: Water vapor and precipitation isotope ratios in Beijing, China, *Journal of Geophysical Research: Atmospheres*, 115, <https://doi.org/10.1029/2009JD012408>, 2010.

Yao, Q., Liu, Z., Han, S., Cai, Z., Liu, J., Hao, T., Liu, J., Huang, X., and Wang, Y.: Seasonal variation and secondary formation of size-segregated aerosol water-soluble inorganic ions in a coast megacity of North China Plain, *Environmental Science and Pollution Research*, 27, 26750-26762, <https://doi.org/10.1007/s11356-020-09052-0>, 2020.

Zhou, J., Duan, J., Wang, J., Liu, H., LI, M., and Jin, W.: Analysis of pollution characteristics and sources of PM<sub>2.5</sub> during heavy pollution in Shijiazhuang city around New Year's Day 2019, *Environmental Science*, 41, 39-49, <https://doi.org/10.13227/j.hjlx.201906085>, 2020.

Cao, L. Nitrogen and oxygen isotope tracing of urban atmospheric nitrate sources and atmospheric processes—taking Beijing and Nanchang as examples. Dissertation for master's degree of East China University of Technology.

Feng, X., Li, Q., Tao, Y., Ding, S., Chen, Y., and Li, X.: Impact of Coal Replacing Project on atmospheric fine aerosol nitrate loading and formation pathways in urban Tianjin: Insights from chemical composition and <sup>15</sup>N and <sup>18</sup>O isotope ratios, *Sci. Total Environ.*, 708, 134797,

<https://doi.org/10.1016/j.scitotenv.2019.134797>, 2020.

Zhang, Y., Zhang, W., Fan, M., Li, J., Fang, H., Cao, F., Lin, Y., Wilkins, B. P., Liu, X., Bao, M., Hong, Y., and Michalski, G.: A diurnal story of  $\Delta^{17}\text{O}(\text{NO}_3^-)$  in urban Nanjing and its implication for nitrate aerosol formation, *npj Climate and Atmospheric Science*, 5, 50, <https://doi.org/10.1038/s41612-022-00273-3>, 2022.

Zhang, Z., Zhou, T., Jiang, Z., Ma, T., Su, G., Ruan, X., Wu, Y., Cao, Y., Wang, X., Liu, Z., Li, W., Zhang, H., Lin, M., Liu, P., and Geng, L.: High-Resolution Measurements of Multi-Isotopic Signatures ( $\delta^{15}\text{N}$ ,  $\delta^{18}\text{O}$ , and  $\Delta^{17}\text{O}$ ) of Winter  $\text{NO}_2$  in a Megacity in Central China, *Environ. Sci. Technol.*, 59, 3634-3644, <https://doi.org/10.1021/acs.est.4c07724>, 2025.

Kroopnick, P., and Craig, H.: Atmospheric Oxygen: Isotopic Composition and Solubility Fractionation, *Science*, 175, 54-55, <https://doi.org/10.1126/science.175.4017.54>, 1972.

Michalski, G., Bhattacharya, S. K., and Girsch, G.:  $\text{NO}_x$  cycle and the tropospheric ozone isotope anomaly: an experimental investigation, *Atmos. Chem. Phys.*, 14, 4935-4953, <https://doi.org/10.5194/acp-14-4935-2014>, 2014.

Michalski, G., Bhattacharya, S. K., and Mase, D. F.: Oxygen Isotope Dynamics of Atmospheric Nitrate and Its Precursor Molecules, in: *Handbook of Environmental Isotope Geochemistry: Vol I*, edited by: Baskaran, M., Springer Berlin Heidelberg, Berlin, Heidelberg, 613-635, [https://doi.org/10.1007/978-3-642-10637-8\\_30](https://doi.org/10.1007/978-3-642-10637-8_30), 2012.

Walters, W. W., and Michalski, G.: Theoretical calculation of oxygen equilibrium isotope fractionation factors involving various  $\text{NO}$  molecules,  $\text{OH}$ , and  $\text{H}_2\text{O}$  and its implications for isotope variations in atmospheric nitrate, *Geochim. Cosmochim. Ac.*, 191, 89-101, <https://doi.org/10.1016/j.gca.2016.06.039>, 2016.
